1 **End-to-end deep learning approach to mouse behavior classification from cortex-**  
2 **wide calcium imaging**

3

4 Takehiro Ajioka<sup>1</sup>, Nobuhiro Nakai<sup>1</sup>, Okito Yamashita<sup>2</sup>, Toru Takumi<sup>1,3\*</sup>

5

6 1 Department of Physiology and Cell Biology, Kobe University School of Medicine,  
7 Chuo, Kobe 650-0017, Japan

8 2 Department of Computational Brain Imaging, ATR Neural Information Analysis  
9 Laboratories, Seika, Kyoto 619-0288, Japan

10 3 RIKEN Center for Biosystems Dynamics Research, Chuo, Kobe 650-0047, Japan

11

12 \*Corresponding author

13 E-mail: [takumit@med.kobe-u.ac.jp](mailto:takumit@med.kobe-u.ac.jp) (TT)

14

15

16 **Abstract**

17 Deep learning is a powerful tool for neural decoding, broadly applied to systems  
18 neuroscience and clinical studies. Interpretable and transparent models which can explain  
19 neural decoding for intended behaviors are crucial to identify essential features of deep  
20 learning decoders in brain activity. In this study, we examine the performance of deep  
21 learning to classify mouse behavioral states from mesoscopic cortex-wide calcium  
22 imaging data. Our convolutional neural network (CNN)-based end-to-end decoder  
23 combined with recurrent neural network (RNN) classifies the behavioral states with high  
24 accuracy and robustness to individual differences on temporal scales of sub-seconds.  
25 Using the CNN-RNN decoder, we identify that the forelimb and hindlimb areas in the  
26 somatosensory cortex significantly contribute to behavioral classification. Our findings  
27 imply that the end-to-end approach has the potential to be an interpretable deep learning  
28 method with unbiased visualization of critical brain regions.

29

30 **Author Summary**

31 Deep learning is used in neuroscience, and it has become possible to classify and predict  
32 behavior from massive data of neural signals from animals, including humans. However,  
33 little is known about how deep learning discriminates the features of neural signals. In

34 this study, we perform behavioral classification from calcium imaging data of the mouse  
35 cortex and investigate brain regions important for the classification. By the end-to-end  
36 approach, an unbiased method without data pre-processing, we clarify that information  
37 on the somatosensory areas in the cortex is important for distinguishing between resting  
38 and moving states in mice. This study will contribute to the development of interpretable  
39 deep-learning technology.

40

## 41 **Introduction**

42 Neural decoding is a method to understand how neural activity relates to perception  
43 systems and the intended behaviors of animals. Deep learning is a powerful tool for  
44 accurately decoding movement, speech, and vision from neural signals from the brain and  
45 for neuroengineering such as brain-computer interface (BCI) technology that utilizes the  
46 correspondence relationship between neural signals and their intentional behavioral  
47 expressions (Craik et al., 2019; LeCun et al., 2015; Livezey and Glaser, 2021). In clinical  
48 studies, electrical potentials measured by implanted electrodes in a specific brain area,  
49 such as the motor cortex, were often used to decode the intended movements such as  
50 finger motion, hand gesture, and limb-reaching behavior (Hochberg et al., 2012; Pan et  
51 al., 2018; Schwemmer et al., 2018; Skomrock et al., 2018). In contrast, neural decoding

52 of the movements with whole-body motion, such as running and walking, remains  
53 uncertain due to measurements of neural activity from the entire brain under immobilized  
54 conditions in functional magnetic resonance imaging (fMRI) and  
55 magnetoencephalography (MEG) scanners and contamination of noise signals (e.g., non-  
56 neuronal electrical signals during muscular contraction) in electroencephalography  
57 (EEG) recording. It is challenging to decode voluntary behaviors from brain dynamics  
58 that contain complex information processing from motor planning to sensory feedback  
59 during the execution of a movement.

60 The calcium imaging technique allows us to measure *in vivo* neural activity  
61 during behavioral conditions from microscopic cellular to mesoscopic cortex-wide scales  
62 (Ren and Komiyama, 2021). Recent studies suggest that cellular activities have enough  
63 resolution for decoding behaviors. The cellular imaging data using microendoscopy in  
64 the hippocampal formation was used to decode free-moving mouse behaviors (Chang et  
65 al., 2021; Etter et al., 2020; Murano et al., 2022) by a Bayesian- and a recurrent neural  
66 network (RNN)-based decoders. In addition, a convolutional neural network (CNN) is  
67 also used to predict the outcome of lever movements from microscopic images of the  
68 motor cortex in mice (Li et al., 2019). On the other hand, it is little known whether  
69 mesoscopic cortex-wide calcium imaging that contains neural activity at the regional

70 population- but not the cellular resolution is applicable for neural decoding of animal  
71 behaviors. This mesoscopic strategy may be appropriate for end-to-end analyses since it  
72 deals with substantial spatiotemporal information of neural activity over the cortex.

73 Minimal preprocessing of input data can attenuate arbitrary interference for  
74 neural decoding. CNN is most applicable to image data, while RNN is often used for  
75 sequential inputs, including time-variable data (LeCun et al., 2015). By taking advantage  
76 of these architectures, we developed a two-step CNN-RNN model for decoding  
77 behavioral states from the mesoscopic cortical fluorescent images without intermediate  
78 processing. Moreover, it is desired to identify biologically essential features for deep  
79 learning classification to make the models interpretable and transparent for explanations  
80 of neural decoding as suggested by XAI-Explainable Artificial Intelligence (Gunning et  
81 al., 2019). To this end, we developed a visualization method of the features that  
82 contributed to the performance of the CNN-RNN-based classifications and identified the  
83 somatosensory areas are the most significant features for the type of behavioral states  
84 during voluntary locomotion behavior. This unbiased identification was supported by  
85 separate analyses of regional cortical activity using deep learning with RNN and the  
86 assessment by Deep SHAP, a developed Shapley additive explanations (SHAP) for deep  
87 learning (Lundberg and Lee, 2017; Vega García and Aznarte, 2020). Our findings

88 demonstrate possibilities for neural decoding of voluntary behaviors with the whole-body  
89 motion from the cortex-wide images and advantages for identifying essential features of  
90 the decoders.

91

## 92 **Results**

93 To perform behavior classification from the cortical activity with deep learning, we used  
94 the previously reported data composed of mesoscopic cortex-wide calcium imaging in  
95 the mouse, which exhibits voluntary locomotion behavior in a virtual environment under  
96 head-fixed conditions (Nakai et al., 2023). The fluorescent calcium signals of the cortex  
97 were imaged at a frame rate of 30 frames/s during a 10-min session (18,000  
98 frames/session) from behaving mice (**Figs 1A–1B**). Two behavioral states (run or rest)  
99 were defined by a threshold of the speed of locomotion ( $>0.5$  cm/s) and binarized as 1 for  
100 a run and 0 for rest in each frame. The proportion of run state differed according to  
101 individual mice (mean  $\pm$  SD; mouse ID1,  $36 \pm 8$  % (n = 11 sessions); ID2,  $66 \pm 22$  % (n  
102 = 12 sessions); ID3,  $65 \pm 16$  % (n = 14 sessions); ID4,  $58 \pm 11$  % (n = 15 sessions); ID5,  
103  $80 \pm 8$  % (n = 12 sessions); **Fig 1C**). To generalize decoding across individuals, we  
104 assigned the data to training, validation, and testing at the ratio of 3:1:1 on a per-mouse  
105 basis (**Fig 1D**). Thus, we generated 20 models for all combinations and classified the test

106 data with each.

107

108 **CNN-based end-to-end deep learning accurately classified behavioral states from**  
109 **functional cortical imaging signals**

110 We tried to classify the behavioral states from images of cortical fluorescent signals using  
111 deep learning with CNN. To handle the single-channel images obtained from calcium  
112 imaging, we converted a consequence three images into a pseudo-3-channel RGB image  
113 by combining the previous and next images with the target image (**Fig 2A**). First, we  
114 trained CNN with EfficientNet B0 (Tan and Le, 2020), where the individual RGB images  
115 were used for input data. The binary behavior labels were used for output (**Fig 2B**). We  
116 used the pre-trained model on ImageNet for the initial weight values in training. In  
117 training, the loss was reduced by increasing epochs in CNN decoders (**Fig 2D, left**).  
118 However, in validation, the loss was increased every epoch (**Fig 2D, left**), suggesting that  
119 models fell into overlearning during CNN training. We chose a model with the lowest  
120 loss in the validation as a decoder at each data allocation. The decoder's performance was  
121 evaluated by the area under the receiver operating characteristic curve (AUC) for all test  
122 data frames. The decoder using CNN alone classified the behavioral states with about  
123 90% accuracy ( $0.896 \pm 0.071$ , mean  $\pm$  SD,  $n = 20$  models; **Fig 2E**).

124 To improve the performance of decoding, we then created a two-step deep  
125 learning architecture that combines CNN with long short-term memory- (LSTM)  
126 (Hochreiter and Schmidhuber, 1997) or gated recurrent unit- (GRU) (Cho et al., 2014)  
127 based RNN, in which the output at the final layer of the CNN was compressed by average  
128 pooling and connected to the RNN (**Fig 2C**). In this stage, input data was the sequential  
129 RGB images from  $-0.17$  s to  $0.17$  s from the image  $t$ , located at the center of the input  
130 time window. We used weights of the former CNN decoders for setting the initial values  
131 in two-step CNN-RNN. As with CNN decoders, the loss of two-step CNN-RNNs was  
132 reduced by the increment of epochs in training, whereas it was increased in validation  
133 (**Fig 2D, right**). The performance of behavior state classification was upgraded using  
134 two-step CNN-RNNs regardless of individual cortical images and behavioral activities  
135 (GRU,  $0.955 \pm 0.034$ ; LSTM,  $0.952 \pm 0.041$ ; mean  $\pm$  SD,  $n = 20$  models; **Fig 2E**). In  
136 addition, we confirmed that the classification accuracy was not significantly affected by  
137 the length of the input window ranged from  $0.067$  s to  $0.50$  s in the two-step deep learning  
138 (**Fig 2F**). These results demonstrate that deep learning decoding with CNN classifies  
139 locomotion and rest states accurately from functional cortical imaging consistently across  
140 individual mice, and the performance of the decoding can be improved by combining it  
141 with RNN.



142

143 **The somatosensory area contains valuable information on the behavioral**  
144 **classification**

145 To make deep learning decoding interpretable, we tried to quantify the critical areas of  
146 images which contributed to the behavioral classification in the CNN-RNN decoder. We  
147 calculated and visualized the importance score in subdivisions of images in each decoder  
148 using a newly developed method named cut-out importance (see Methods for details).  
149 Briefly, a subdivision of the image was covered with a mask filled with 0 before training.  
150 The decoder trained with the masked images was compared with the decoder with original  
151 unmasked images (**Fig 3A**). The importance score indicates how much the decoder's  
152 performance was affected by the masked area. As a result, the highest importance score  
153 was detected slightly above the middle of the left hemisphere ( $0.054 \pm 0.045$ ; mean  $\pm$  SD,  
154  $n = 20$  models; **Fig 3B**). The symmetrical opposite area is also higher than other  
155 subdivisions within the right hemisphere ( $0.024 \pm 0.014$ ). This laterality seemed to be  
156 derived from individual differences (**S1 Fig**). These subdivisions corresponded to the  
157 anterior forelimb and hindlimb areas of the somatosensory cortex (**Fig 3C**; **S2 Fig**).

158

159 **Regional cortical activity is applicable for the behavioral classification using RNN**

160 **decoders**

161 To confirm the contribution of the somatosensory cortex in the decoding performance,  
162 we designed RNN decoders to classify the behavioral states from activities of the specific  
163 cortical areas. For this purpose, the fluorescent signals at 50 regions of interest (ROIs) in  
164 the cortex were analyzed as regional cortical activities that accord with known cortical  
165 parcellations of the mouse brain (**S2 Fig**; (Nakai et al., 2023)). To reduce baseline  
166 fluctuation of cortical activity, we performed data preprocessing by subtracting a 1,000-  
167 frame moving average from the normalized fluorescent signals at each ROI (**S3 Fig**).

168 At the beginning of the deep learning decoding with RNN, we used a GRU  
169 architecture and set an input window of size 31, including a one-second duration of  
170 cortical activity that ranged from  $-0.5$  s ( $-15$  frames) to  $0.5$  s ( $+15$  frames) from the  
171 behavioral state-target label (frame  $t$ ) (**Fig 4A**). To train the deep learning models, we  
172 used the  $\pm 0.5$  s input window with a one-frame sliding window for a total of 1,152,000  
173 frames data ( $n = 64$  sessions). The random batches of size 256 with Adam optimizer  
174 (<https://keras.io/api/optimizers/adam/> (Kingma and Ba, 2017)) and binary cross-entropy  
175 loss function were used as model parameters. The models were trained across 30 epochs  
176 to converge the loss substantially. In the training data, the loss was reduced in the first 10  
177 epochs, with a slight improvement in the following epochs, and the accuracy was

178 dramatically improved and almost saturated within the first 10 epochs (**Fig 4B**). In the  
179 validation, although changes of loss and accuracy behaved similarly, the loss was about  
180 twice, and the accuracy was slightly decreased compared to the training (**Fig 4B**). We  
181 chose a model with the lowest loss in the validation as a decoder at each data allocation.  
182 Then, the decoders classified all frames of the test data into the two behavioral states in  
183 good agreement with the behavioral labels (**Fig 4C**), supported by the AUC (**Fig 4D**).  
184 The GRU decoder trained with preprocessing data (mean  $\pm$  SD; GRU,  $0.974 \pm 0.014$ ;  $n =$   
185 20 each; **Fig 4E**) showed significantly higher performance of behavioral classification  
186 with high accuracy than the GRU decoder trained with un-preprocessing data (Raw,  $0.911$   
187  $\pm 0.057$ ). Both performances were considerably higher than the control decoder, a null  
188 model trained with randomly assigned behavioral labels (Random,  $0.492 \pm 0.031$ ).

189 We next examined how much the architectures of RNN affect the decoder  
190 performance. All decoders classified behavioral states with high accuracy over 0.95 on  
191 average (mean  $\pm$  SD; LSTM,  $0.970 \pm 0.013$ ; Simple,  $0.953 \pm 0.035$ ; Bi-LSTM,  $0.960 \pm$   
192  $0.020$ ; Bi-GRU,  $0.974 \pm 0.012$ ; Bi-Simple,  $0.967 \pm 0.016$ ; **Fig 4F**), while the simple RNN  
193 decoder only underperformed compared with the GRU decoder ( $P < 0.05$ , Wilcoxon rank  
194 sum test with Holm correction). Given the accuracy and variance in these decoder  
195 performances, GRU and bidirectional GRU architectures are most suitable for the

196 behavioral classification from cortical activity. We used, hereinafter, GRU but not  
197 bidirectional GRU as an RNN architecture to simplify the process and time of computing.

198 We investigated whether the temporal specificity of the input data affects the  
199 performance of GRU decoders. The initial setting of the length of the input window was  
200 0.5 s when the length contains information on cortical fluorescent signals ranging  
201 between 0.5 s before and after the center of the input window (i.e., 0 s). The shift 0 s was  
202 initially chosen, which means the position of the behavioral label at 0 s (**Fig 5A**).

203 Regarding the analysis of length, the accuracy of the decoder performance from length  
204 0.33 s to 1.0 s did not differ (**Fig 5B**). Only the accuracy was significantly decreased at  
205 length 0.17 s, suggesting that a temporally enough length ( $\geq 0.33$  s) of input window is  
206 needed to obtain information of behavioral states from cortical activity. We then  
207 examined the temporal distance of the decoding target from the center of the input  
208 window by shifting the position of the target labels in a time range from  $-2$  s (backward  
209 in time) to 2 s (forward in time) (**Fig 5C**). The accuracy of back-shifted target labels  
210 gradually but significantly decreased with distance from the center of the input window.

211 Similarly, in the forward shift of target labels, the performance was significantly degraded  
212 when the target labels were set to more than 0.33 s distant from the center of the input  
213 window. These results suggest that our decoders are more fitting for predicting current

214 states than future and past states of behaviors.

215

216 **Cortical activity in the somatosensory limb areas contributes to the behavioral**  
217 **classification**

218 Finally, we assessed how much cortical areas significantly impact the GRU decoder using  
219 Deep SHAP (see Methods for details). We visualized a SHAP value which is the index  
220 to what extent each feature contributes to the behavioral classification in the trained  
221 models. The SHAP values in a model were calculated against each input window from  
222 ~5% of randomly selected test data. The absolute SHAP values were averaged across all  
223 models to quantify the degree of importance in cortical areas (**Fig 6A**). The remarkably  
224 high SHAP values were detected in the anterior regions of the somatosensory forelimb  
225 (FLa, ROIs 6 and 31) and hindlimb (HLa, ROIs 8 and 33) areas. The peaks of SHAP  
226 values were observed around +0.1 s after the center of the input window. Although SHAP  
227 values of many cortical areas surpassed those in null models, overall, the magnitudes were  
228 smaller than the somatosensory areas (**Fig 6B**).

229 Based on the results of SHAP, we trained the model using input data only from  
230 FLa and HLa (ROIs 6, 8, 31, and 33) and confirmed the performance of the behavioral  
231 classification (**Fig 6C**). We masked the signals out of these areas by replacing them with

232 value 0 and used the masked data to train and test the GRU decoder (FLa&HLa).  
233 Oppositely, we masked the signals in FLa and HLa with 0 and trained and tested the GRU  
234 decoder (Other). The decoder performance using the somatosensory areas was compatible  
235 with the decoder trained with all area data (FLa&HLa,  $0.966 \pm 0.026$ ; mean  $\pm$  SD,  $n = 20$   
236 models; **Fig 6D**). However, the decoder using other cortical areas underperformed (Other,  
237  $0.938 \pm 0.011$ ; mean  $\pm$  SD,  $n = 20$  models; **Fig 6D**).

238 We further tested the group of cortical areas. We divided bilateral cortical areas  
239 into five parts (motor areas (M2&M1, ROIs 1–4, 26–29); somatosensory limb areas  
240 (FL&HL, ROIs 6–9, 31–34); parietal and retrosplenial areas (PT&RS, ROIs 14–17, 49–  
241 52); primary visual and medial visual areas (V1&Vm, ROIs 18–21, 43–46); lateral visual  
242 and auditory areas (Vl&A1, ROIs 22–25, 47–50); **Fig 6E**) and used them separately for  
243 GRU training. The decoder performances were  $0.869 \pm 0.037$  in M2&M1,  $0.966 \pm 0.030$   
244 in FL&HL,  $0.776 \pm 0.097$  in PT&RS,  $0.793 \pm 0.060$  in V1&Vm, and  $0.798 \pm 0.058$  in  
245 Vl&A1 (mean  $\pm$  SD,  $n = 20$  models, respectively; **Fig 6F**). Consistent with the results in  
246 Fig. 5B, the decoder trained with FL&HL classified behavioral states with the highest  
247 accuracy. Moreover, the motor area's decoder outperformed other cortical areas except  
248 for FL&HL. The correlation of the cortical activities with dynamics of behavioral states  
249 was weakly positive in all areas (mean  $\pm$  SD;  $0.21 \pm 0.10$ ,  $n = 50$  ROIs; **S4 Fig**), which

250 could not explain the predominance of the somatosensory limb areas in the GRU decoders.

251 In summary, our methods accurately classified mouse behavioral states from  
252 cortex-wide functional images consistent across mice and identified the essential features  
253 of cortical areas for behavioral classification in deep learning with both CNN and RNN.  
254 These results suggest the possibility of generalized neural decoding of voluntary  
255 behaviors with a whole-body motion from the cortical activity and the generation of  
256 interpretable decoders by end-to-end approach.

257

## 258 **Discussion**

### 259 **Advantages of end-to-end behavior decoding from cortical calcium imaging**

260 The present study demonstrated that deep learning using CNN-based end-to-end  
261 approaches accurately decoded the mouse behavioral states from cortical activity  
262 measured by mesoscopic calcium imaging. Recently, attempted speech and handwriting  
263 movements have been decoded on the temporal scales in real-time from the cortical  
264 activity obtained by microelectrode array and electrocorticography (ECoG) from human  
265 patients (Makin et al., 2020; Pan et al., 2018; Willett et al., 2021). Compared with the  
266 electrical recordings, calcium imaging is temporally slow but spatially high with a  
267 variable range of resolution from synaptic and cellular to regional scales. In CNN-RNN

268 decoders, the robust performance of behavior classification was obtained using an input  
269 window from 0.067 s to 0.5 s. Our results indicate that the high spatial resolution of the  
270 calcium imaging contains sufficient information for decoding the mouse behavior even  
271 in the sub-second temporal order.

272           Furthermore, we visualized the importance of brain areas, the somatosensory  
273 cortex limb areas, for behavioral classification by the CNN-based end-to-end approach.  
274 These areas were commonly detected in the CNN-RNN decoders, suggesting that models  
275 were generalized between mice. Regional cortical activity in the somatosensory areas  
276 contributed to the decoding performance, supported by the RNN decoders. Since mice  
277 receive sensory inputs from the left and right limbs when moving on and touching the  
278 treadmill, the regional activity in the somatosensory areas may be reflected as a featured  
279 cortical response during locomotion. In addition, the primary somatosensory cortex also  
280 receives prior information about future movements from the primary motor cortex  
281 (Umeda et al., 2019). Utilizing the neural information from input-output relationships,  
282 such as the motor and somatosensory cortices, improves the performance of robotic arm  
283 control (Flesher et al., 2021). Our interpretable approach for deep learning decoders may  
284 help to identify multiregional cortical activities related to behavioral expressions.

285



## 286 **Combination of CNN and RNN for behavior decoding**

287 Recently, a convolutional and recurrent neural network model has been applied to  
288 decoding finger trajectory from ECoG data, in which CNN was used to extract the  
289 features, and LSTM was used to capture the temporal dynamics of the signal (Xie et al.,  
290 2018). Similar to this architecture, our decoder with CNN-RNN effectively worked for  
291 mouse behavior classification and was superior to the decoder with CNN alone.  
292 Furthermore, the architecture LSTM followed by CNN was also applied to decoding the  
293 brain activity using EEG by reconstructing the visual stimuli, and it performed more  
294 accurately than the architecture CNN followed by LSTM (Zheng et al., 2020). The  
295 direction of architectures should be considered as a critical factor in the case of the  
296 combination of deep learning methods. By expanding the application of these methods in  
297 neuroscience research, behavior decoding from brain activity can deal with more complex  
298 patterns of behaviors with high temporal information, leading to the further development  
299 of BCI technologies.

300

## 301 **Materials and Methods**

### 302 **Datasets**

303 We used the previously reported dataset, including the 18,000-frame images of  
304 fluorescent signals in the cortex measured by mesoscopic calcium imaging at 30  
305 frames/second and the time-matched behavioral states of locomotion and rest from head-  
306 fixed mice (Nakai et al., 2023). The dataset contains 64 sessions (for 10 min/session) from  
307 five Emx1G6 mice. The number of sessions in each mouse was 11, 12, 14, 15, and 12.  
308 We used all images ( $128 \times 128$  pixels  $\times$  18,000 frames  $\times$  64 sessions) for deep learning  
309 decoding with CNN and RNN. For deep learning analysis, we divided the five mice into  
310 subgroups at the rate of 3:1:1 for training, validation, and testing, respectively, to perform  
311 cross-validation, generating the twenty models in total (four models for each testing). For  
312 behavioral labeling, the frames with a locomotion speed more significant or less than 0.5  
313 cm/s were defined as a state of “Run” or “Rest,” respectively.

314

### 315 **Data analysis**

#### 316 *Deep learning with CNN-RNN*

317 Deep learning with CNN-RNN was performed using Python 3.6, Anaconda Packages,  
318 PyTorch (<https://pytorch.org>), and fastai (<https://docs.fast.ai>). We used a PC equipped

319 with Ubuntu 18.04 OS and NVIDIA GeForce RTX3090 GPU. All images were  
320 normalized by subtracting the average intensity in each pixel. The normalized images  
321 were divided by the variance of intensities of all pixels. For CNN classification, all images  
322 were then converted to an RGB image  $I_t$  by combining three consecutive images from  
323 one frame before (red,  $t-1$ ) to one frame after (blue,  $t+1$ ) the target image  $t$  (green) with  
324 labeling a behavioral state of the target image  $t$  (Fig 2A). As the architecture of CNN,  
325 EfficientNet B0 was used from the Python package in GitHub  
326 (<https://github.com/lukemelas/EfficientNet-PyTorch>) (Tan and Le, 2020).

327 First, we trained the CNN to classify the behavioral state from the RGB images  
328 in the same manner of data allocation as deep learning with RNN. For the initial values  
329 of the CNN, we used the publicly available model that was pre-trained by ImageNet  
330 (Russakovsky et al., 2015). We used the random batches of size 512 using Adam  
331 optimizer (<https://keras.io/api/optimizers/adam/> (Kingma and Ba, 2017)), binary cross-  
332 entropy loss function, and one-cycle training with a maximum learning rate of 0.001.  
333 After training, 1,280 features were extracted and fully connected to an output node. The  
334 activation function of the output node was set as sigmoid for binary classification of  
335 behavior labels. The number of epochs was set to 3. The model with the lowest loss in  
336 the validation data was adopted.

337           Next, a two-step training with CNN and RNN was performed for behavior state  
338 classification. Following the CNN training (Step 1), in which the initial values were set  
339 to the CNN models trained at the first stage, the RNN was trained using input data of  
340 sequential RGB images (Step 2). The inputs of RGB images for CNN were initially eleven  
341 consecutive images ranging from 0.17 s before ( $I_t - 5$ ) to 0.17 s after ( $I_t + 5$ ) the image  $t$ ,  
342 which was labeled with the behavioral state at image  $I_t$  (Fig 2A). After the convolution  
343 layer of CNN, 1,280 features per image were extracted by compression with average  
344 pooling and recursively input to RNN. The GRU and LSTM were used as the RNN  
345 architectures, which consisted of 128 units, 2 layers, and a dropout of 0.2. The hyperbolic  
346 tangent function was used as an activation function for RNN. The RNN units in the  
347 second layer were then fully connected to an output node. The activation function of the  
348 output node was set to sigmoid for the binary classification of behavior labels. We used  
349 the random batches of size 32 using Adam optimizer, binary cross-entropy loss function,  
350 and one-cycle training with the maximum learning rate of 0.001. The number of epochs  
351 was set to 3. The mixed precision (<https://docs.fast.ai/callback.fp16.html>) was used to  
352 improve the efficiency of the two-step training. We evaluated the loss for each Epoch and  
353 adopted the model with the lowest loss in the validation data. To compare the size of the  
354 input data for the CNN-RNN classification, we tested four different lengths of the time

355 window, i.e., 0.067 s ( $t \pm 2$ ), 0.17 s ( $t \pm 5$ ), 0.33 s ( $t \pm 10$ ), and 0.5 s ( $t \pm 15$ ) before and after  
356 the image  $t$  (Fig 2F). The decoder performance was evaluated by the area under the  
357 receiver operating characteristic curve (AUC) for the classification of the test data.

358

### 359 *Cut-out importance*

360 We quantified the critical areas of images which contributed to the behavioral  
361 classification in the CNN-RNN decoder. The image ( $128 \times 128$  pixels) was divided into  
362 a 32-pixel square with a 16-pixel overlap, and each end was connected to the opposite  
363 end, thus obtaining 64 compartments. Before the CNN-RNN training, all pixels in a  
364 compartment were masked with a value of 0. We then trained the CNN-RNN by  
365 excluding information in the masked compartment area. Each compartment was scored  
366 by importance score, calculated by subtracting the AUC using the decoder trained with  
367 the masked data from the AUC using the decoder with the unmasked data.

$$368 \quad \text{Importance score} = AUC_{base} - AUC_{masked}$$

369 The importance score indicates how much the decoder performance using masked data  
370 ( $AUC_{masked}$ ) decreased compared to unmasked data ( $AUC_{base}$ ). The importance scores at  
371 one-fourth of the 32-pixel square were averaged among four times overlaps at the  
372 different masked areas and plotted on an  $8 \times 8$  heat map. Then, the heat maps were

373 averaged across all models. We named this analysis “cut-out importance.”

374

### 375 ***Preprocessing of regional cortical activity***

376 This analysis was performed using MATLAB (MathWorks). The changes in cortical  
377 activity were calculated from fluorescent signals at the 50 regions of interest (ROIs) in  
378 the cortex (25 ROIs in each hemisphere), which was represented by  $dF/F$ , a percentage  
379 of changes from the baseline fluorescence (Nakai et al., 2023). In this study, a 1,000-  
380 frame moving average of  $dF/F$  was subtracted from  $dF/F$  to attenuate baseline variation  
381 of the fluorescent changes, which was an optimal filter size (S3 Fig).

382

### 383 ***Deep learning with RNN***

384 Deep learning with recurrent neural network (RNN) was performed using Python 3.6  
385 (<https://www.python.org/>), Anaconda Packages  
386 ([https://docs.anaconda.com/anaconda/packages/old-pkg-lists/2021.05/py3.6\\_win-64/](https://docs.anaconda.com/anaconda/packages/old-pkg-lists/2021.05/py3.6_win-64/)),  
387 TensorFlow (<https://www.tensorflow.org/>) and Keras (<https://keras.io/>). A PC with  
388 Ubuntu 16.04 OS and NVIDIA GeForce RTX2080 GPU was used. The code for deep  
389 learning is available in the following GitHub repository  
390 ([https://github.com/atakehiro/Neural\\_Decoding\\_from\\_Calcium\\_Imaging\\_Data](https://github.com/atakehiro/Neural_Decoding_from_Calcium_Imaging_Data)).

391 For binary classification of behavioral states, we assigned a value of 1 and 0 to  
392 the frames labeled “Run” and “Rest,” respectively. The input data of deep learning was  
393 31 frames of the preprocessed dF/F, which localized from 15 frames before to 15 frames  
394 after a behavior-labeled frame, and a one-frame sliding window was used to cover all  
395 except for the first and last 15 frames. This period ranged up to 0.5 s after the behavioral  
396 expression had been used in the previous study (Pan et al., 2018). Each input data was  
397 normalized by Min-Max Scaling. We used six RNN architectures of deep learning  
398 (simple RNN, LSTM, GRU, and their bidirectional counterparts) for behavior  
399 classification in the same manner. The deep learning was trained with the random batches  
400 of size 256 using Adam optimizer (Kingma and Ba, 2017) and binary cross-entropy loss  
401 function. The unit number of RNN was set to 32. The hyperbolic tangent function was  
402 used as an activation function. The RNN is followed by a one-node fully connected layer.  
403 The activation function of the last classification node was set to sigmoid for the binary  
404 classification of behavior labels, and the label smoothing was set to 0.01. The number of  
405 epochs was set to 30, in which the models reached a stable loss and accuracy for the  
406 training and validation data. The model in the epoch with the lowest loss in the validation  
407 data was adopted. As a control, we generated the models trained with the behavioral labels  
408 permuted randomly (Random) and the models trained with non-preprocessed dF/F (Raw).

409 The decoder performance was evaluated by the AUC for the classification of the test data.

410

#### 411 *Analysis of temporal differences in the input window using RNN decoders*

412 To investigate the optimal conditions, we compared GRU decoders trained using the

413 different lengths of the input time window and the temporally shifted target labels of

414 behavioral classification (Fig 5). The target labels have temporally shifted the position

415 from the center of the time window in the ranges from  $-2$  to  $2$  s (from  $-60$  to  $60$  frames)

416 at 10-frames steps. The lengths of time window size 5, 10, 15, 20, 25, and 30, and the

417 shifts of target label  $-60$ ,  $-50$ ,  $-40$ ,  $-30$ ,  $-20$ ,  $-10$ ,  $0$ ,  $10$ ,  $20$ ,  $30$ ,  $40$ ,  $50$ , and  $60$  were analyzed.

418

#### 419 *Deep SHAP*

420 We used Deep SHAP (the SHAP Python package in GitHub

421 (<https://github.com/slundberg/shap>)) to visualize the basis for deep learning

422 classifications. Deep SHAP is one of the feature attribution methods designed by

423 combining SHAP (SHapley Additive exPlanation), which assigns each feature an

424 importance value for machine learning predictions, with DeepLIFT, which is an additive

425 feature attribution method that satisfies local accuracy and missingness (Lundberg and

426 Lee, 2017). In this analysis, we randomly selected 10,000 frames from the test data (total



427 198,000-270,000 frames/test) to calculate SHAP values of each ROI, indicating the extent  
428 of contribution to the model output. The absolute SHAP values were averaged and  
429 represented as the overall importance of each ROI.

430

### 431 **Statistics**

432 All statistical analyses were conducted in MATLAB (MathWorks). All bar plots with  
433 error bars represent mean  $\pm$  SD. All box plots represent the median with interquartile  
434 range (IQR) (box) and  $1.5 \times$  IQR (whiskers), gray lines indicate the line plot of individual  
435 results, and 'o' symbols indicate the outlier. For all statistical tests, the normality of the  
436 data and equal variance of groups were not assumed, and non-parametric tests were used  
437 for group comparisons. Wilcoxon rank-sum test with Holm correction was used. The  
438 significance level was set to  $P < 0.05$ .

439

### 440 **Acknowledgment**

441 This work was supported in part by KAKENHI from JSPS, JP16H06316, JP16H06463,  
442 JP21H00202, JP21H04813, and JP21K19351; Japan Agency for Medical Research and  
443 Development (JP21wm0425011); Japan Science and Technology Agency (JPMJMS2299,  
444 JPMJMS229B); Intramural Research Grant (30-9) for Neurological and Psychiatric

445 Disorders of NCNP; The Takeda Science Foundation, Research Foundation for Opto-  
446 Science and Technology, Taiju Life Social Welfare Foundation, The Naito Foundation,  
447 and The Tokumori Yasumoto Memorial Trust for Researches on Tuberos Sclerosis  
448 Complex and Related Rare Neurological Diseases. NN was also supported by KAKENHI  
449 from JSPS: JP19H04942.

450

#### 451 **Author contributions**

452 Conceptualization, TA and NN; methodology, TA, NN, and OY; investigation, TA;  
453 visualization, TA and NN; supervision, NN and TT; writing—original draft, TA;  
454 writing—review & editing: NN, OY, and TT; funding acquisition, NN and TT.

455

#### 456 **Competing interests**

457 The authors have no conflict of interest.

458

#### 459 **Data and materials availability**

460 All data are available by the authors upon reasonable request. Codes are available here:  
461 [https://github.com/atakehiro/Neural\\_Decoding\\_from\\_Calcium\\_Imaging\\_Data](https://github.com/atakehiro/Neural_Decoding_from_Calcium_Imaging_Data).

462

463 **References**

- 464 Chang, C.-J., Guo, W., Zhang, J., Newman, J., Sun, S.-H., Wilson, M., 2021. Behavioral  
465 clusters revealed by end-to-end decoding from microendoscopic imaging.  
466 <https://doi.org/10.1101/2021.04.15.440055>
- 467 Cho, K., van Merriënboer, B., Gulcehre, C., Bahdanau, D., Bougares, F., Schwenk, H.,  
468 Bengio, Y., 2014. Learning Phrase Representations using RNN Encoder-Decoder  
469 for Statistical Machine Translation. <https://doi.org/10.48550/arXiv.1406.1078>
- 470 Craik, A., He, Y., Contreras-Vidal, J.L., 2019. Deep learning for electroencephalogram  
471 (EEG) classification tasks: a review. *J. Neural Eng.* 16, 031001.  
472 <https://doi.org/10.1088/1741-2552/ab0ab5>
- 473 Etter, G., Manseau, F., Williams, S., 2020. A Probabilistic Framework for Decoding  
474 Behavior From in vivo Calcium Imaging Data. *Front Neural Circuits* 14, 19.  
475 <https://doi.org/10.3389/fncir.2020.00019>
- 476 Flesher, S.N., Downey, J.E., Weiss, J.M., Hughes, C.L., Herrera, A.J., Tyler-Kabara, E.C.,  
477 Boninger, M.L., Collinger, J.L., Gaunt, R.A., 2021. A brain-computer interface  
478 that evokes tactile sensations improves robotic arm control. *Science* 372, 831–836.  
479 <https://doi.org/10.1126/science.abd0380>
- 480 Gunning, D., Stefik, M., Choi, J., Miller, T., Stumpf, S., Yang, G.-Z., 2019. XAI-

- 481 Explainable artificial intelligence. *Sci Robot* 4, eaay7120.  
482 <https://doi.org/10.1126/scirobotics.aay7120>
- 483 Hochberg, L.R., Bacher, D., Jarosiewicz, B., Masse, N.Y., Simeral, J.D., Vogel, J.,  
484 Haddadin, S., Liu, J., Cash, S.S., van der Smagt, P., Donoghue, J.P., 2012. Reach  
485 and grasp by people with tetraplegia using a neurally controlled robotic arm.  
486 *Nature* 485, 372–375. <https://doi.org/10.1038/nature11076>
- 487 Hochreiter, S., Schmidhuber, J., 1997. Long short-term memory. *Neural Comput* 9, 1735–  
488 1780. <https://doi.org/10.1162/neco.1997.9.8.1735>
- 489 Kingma, D.P., Ba, J., 2017. Adam: A Method for Stochastic Optimization.  
490 <https://doi.org/10.48550/arXiv.1412.6980>
- 491 LeCun, Y., Bengio, Y., Hinton, G., 2015. Deep learning. *Nature* 521, 436–444.  
492 <https://doi.org/10.1038/nature14539>
- 493 Li, C., Chan, D.C.W., Yang, X., Ke, Y., Yung, W.-H., 2019. Prediction of Forelimb  
494 Reach Results From Motor Cortex Activities Based on Calcium Imaging and  
495 Deep Learning. *Front Cell Neurosci* 13, 88.  
496 <https://doi.org/10.3389/fncel.2019.00088>
- 497 Livezey, J.A., Glaser, J.I., 2021. Deep learning approaches for neural decoding across  
498 architectures and recording modalities. *Brief Bioinform* 22, 1577–1591.

- 499 <https://doi.org/10.1093/bib/bbaa355>
- 500 Lundberg, S., Lee, S.-I., 2017. A Unified Approach to Interpreting Model Predictions.
- 501 <https://doi.org/10.48550/arXiv.1705.07874>
- 502 Makin, J.G., Moses, D.A., Chang, E.F., 2020. Machine translation of cortical activity to
- 503 text with an encoder-decoder framework. *Nat Neurosci* 23, 575–582.
- 504 <https://doi.org/10.1038/s41593-020-0608-8>
- 505 Murano, T., Nakajima, R., Nakao, A., Hirata, N., Amemori, S., Murakami, A., Kamitani,
- 506 Y., Yamamoto, J., Miyakawa, T., 2022. Multiple types of navigational
- 507 information are independently encoded in the population activities of the dentate
- 508 gyrus neurons. *Proc Natl Acad Sci U S A* 119, e2106830119.
- 509 <https://doi.org/10.1073/pnas.2106830119>
- 510 Nakai, N., Sato, M., Yamashita, O., Sekine, Y., Fu, X., Nakai, J., Zalesky, A., Takumi,
- 511 T., 2023. Virtual reality-based real-time imaging reveals abnormal cortical
- 512 dynamics during behavioral transitions in a mouse model of autism. *Cell Rep*
- 513 112258. <https://doi.org/10.1016/j.celrep.2023.112258>
- 514 Pan, G., Li, J.-J., Qi, Y., Yu, H., Zhu, J.-M., Zheng, X.-X., Wang, Y.-M., Zhang, S.-M.,
- 515 2018. Rapid Decoding of Hand Gestures in Electrocorticography Using Recurrent
- 516 Neural Networks. *Front Neurosci* 12, 555.

- 517 <https://doi.org/10.3389/fnins.2018.00555>
- 518 Ren, C., Komiyama, T., 2021. Characterizing Cortex-Wide Dynamics with Wide-Field  
519 Calcium Imaging. *J. Neurosci.* 41, 4160–4168.  
520 <https://doi.org/10.1523/JNEUROSCI.3003-20.2021>
- 521 Russakovsky, O., Deng, J., Su, H., Krause, J., Satheesh, S., Ma, S., Huang, Z., Karpathy,  
522 A., Khosla, A., Bernstein, M., Berg, A.C., Fei-Fei, L., 2015. ImageNet Large  
523 Scale Visual Recognition Challenge. *Int J Comput Vis* 115, 211–252.  
524 <https://doi.org/10.1007/s11263-015-0816-y>
- 525 Schwemmer, M.A., Skomrock, N.D., Sederberg, P.B., Ting, J.E., Sharma, G., Bockbrader,  
526 M.A., Friedenberg, D.A., 2018. Meeting brain–computer interface user  
527 performance expectations using a deep neural network decoding framework. *Nat*  
528 *Med* 24, 1669–1676. <https://doi.org/10.1038/s41591-018-0171-y>
- 529 Skomrock, N.D., Schwemmer, M.A., Ting, J.E., Trivedi, H.R., Sharma, G., Bockbrader,  
530 M.A., Friedenberg, D.A., 2018. A Characterization of Brain-Computer Interface  
531 Performance Trade-Offs Using Support Vector Machines and Deep Neural  
532 Networks to Decode Movement Intent. *Front Neurosci* 12, 763.  
533 <https://doi.org/10.3389/fnins.2018.00763>
- 534 Tan, M., Le, Q.V., 2020. EfficientNet: Rethinking Model Scaling for Convolutional

- 535 Neural Networks. <https://doi.org/10.48550/arXiv.1905.11946>
- 536 Umeda, T., Isa, T., Nishimura, Y., 2019. The somatosensory cortex receives information  
537 about motor output. *Sci Adv* 5, eaaw5388.  
538 <https://doi.org/10.1126/sciadv.aaw5388>
- 539 Vega García, M., Aznarte, J.L., 2020. Shapley additive explanations for NO2 forecasting.  
540 *Ecological Informatics* 56, 101039. <https://doi.org/10.1016/j.ecoinf.2019.101039>
- 541 Willett, F.R., Avansino, D.T., Hochberg, L.R., Henderson, J.M., Shenoy, K.V., 2021.  
542 High-performance brain-to-text communication via handwriting. *Nature* 593,  
543 249–254. <https://doi.org/10.1038/s41586-021-03506-2>
- 544 Xie, Z., Schwartz, O., Prasad, A., 2018. Decoding of finger trajectory from ECoG using  
545 deep learning. *J Neural Eng* 15, 036009. [https://doi.org/10.1088/1741-  
546 2552/aa9dbe](https://doi.org/10.1088/1741-2552/aa9dbe)
- 547 Zheng, X., Chen, W., Li, M., Zhang, T., You, Y., Jiang, Y., 2020. Decoding human brain  
548 activity with deep learning. *Biomedical Signal Processing and Control* 56, 101730.  
549 <https://doi.org/10.1016/j.bspc.2019.101730>

550

551

552 **Supporting information**

553 S1 Fig. Importance scores in each session.

554 S2 Fig. Fluorescent calcium signals and corresponding cortical areas.

555 S3 Fig. Preprocessing of the fluorescent signals for deep learning classification.

556 S4 Fig. Correlation between fluorescent signals and locomotor activity.

557



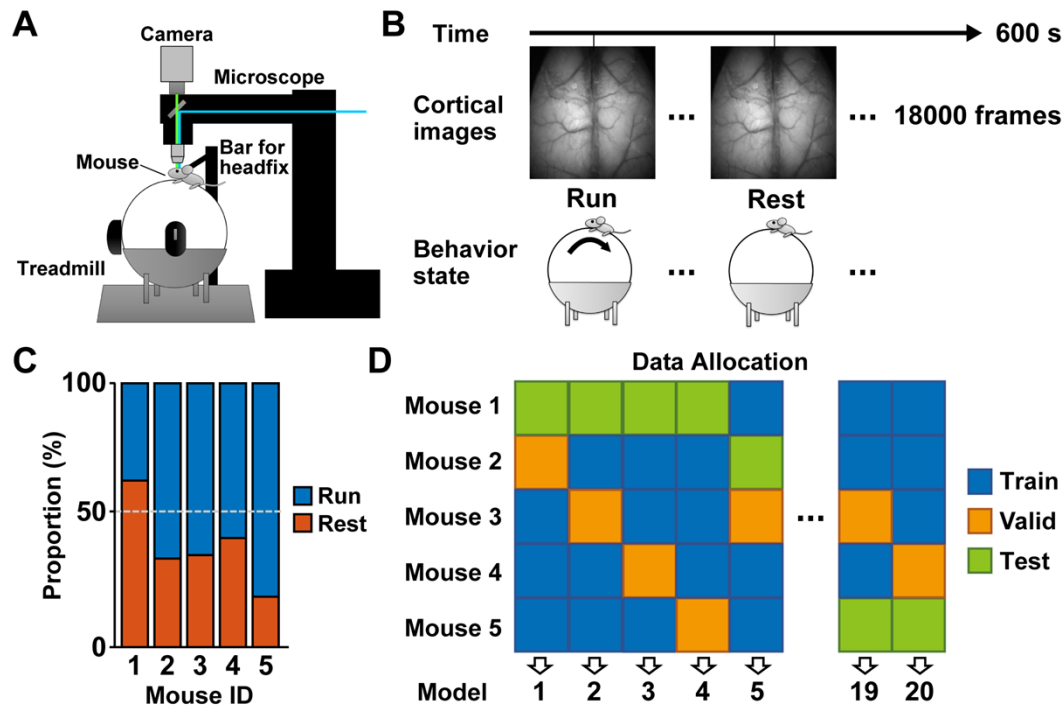

558 **Fig 1. Cortical activity and behavioral states in behaving mice.**

559 (A) A schematic illustration of the experimental setup for measuring mesoscopic cortical  
560 calcium imaging and locomotor activity.

561 (B) Images were obtained at 30 frames per second during a 600 s session. The label of  
562 behavioral state was based on locomotion speed ( $>0.5$  cm/s) at the corresponding frame.

563 (C) Proportions of the behavioral states in each mouse ( $n = 11-14$  sessions from 5 mice).

564 (D) The data allocation on a per-mouse basis. The data of each mouse was assigned at the  
565 ratio of 3:1:1 for training (Train), validation (Valid), and testing (Test).

566

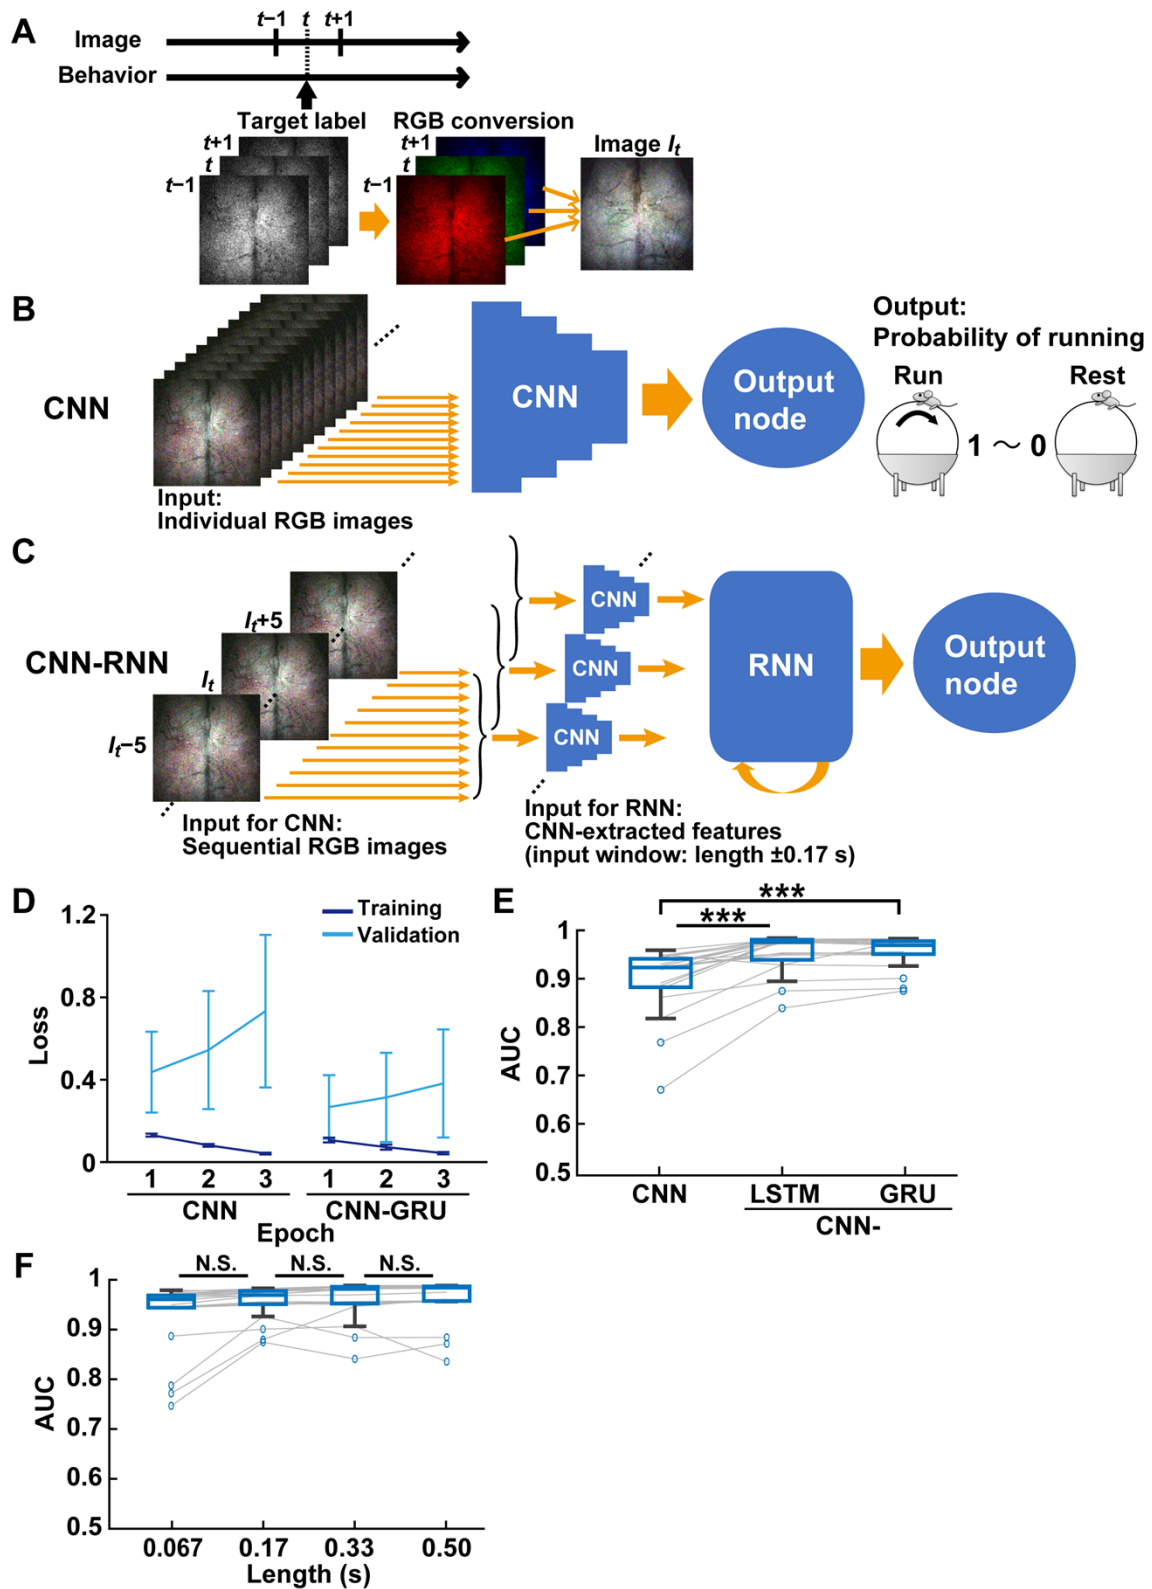

568 **Fig 2. Behavioral state classification using deep learning with CNN.**

569 (A) Image preprocessing for deep learning with CNN. An image at frame  $t$  with images  
570 at neighboring frames (frame  $t - 1$  and  $t + 1$ ) was converted to an RGB image (image  $I_t$ )  
571 labeled with the behavioral state.

572 (B) Schematic diagram of the CNN decoder. CNN was trained with individual RGB  
573 images. Then, CNN outputs the probability of running computing from the 1,820  
574 extracted features for each image.

575 (C) Schematic diagram of the CNN-RNN decoder. The pre-trained CNN extracted 1,820  
576 features from individual RGB images in the first step. In the second step, a series of 1,820  
577 extracted features obtained from consecutive images (e.g., eleven images from  $I_t - 5$  to  $I_t$   
578  $+ 5$  (= input window, length  $\pm 0.17$  s)) were input to GRU-based RNN. Then, the RNN  
579 output probability of running.

580 (D) Loss of CNN and CNN-GRU during training and validation across three epochs.

581 (E) The area under the receiver operating characteristic curves (AUC) was used to  
582 indicate the accuracy of decoders. The performance of decoders with CNN, CNN-LSTM,  
583 and CNN-GRU. \*\*\* $P < 0.001$ , Wilcoxon rank-sum test with Holm correction,  $n = 20$   
584 models.

585 (F) The performance of CNN-GRU decoders was not significantly different between

586 different lengths of the input window. N.S., not significant, Wilcoxon rank-sum test with

587 Holm correction,  $n = 20$  models.

588

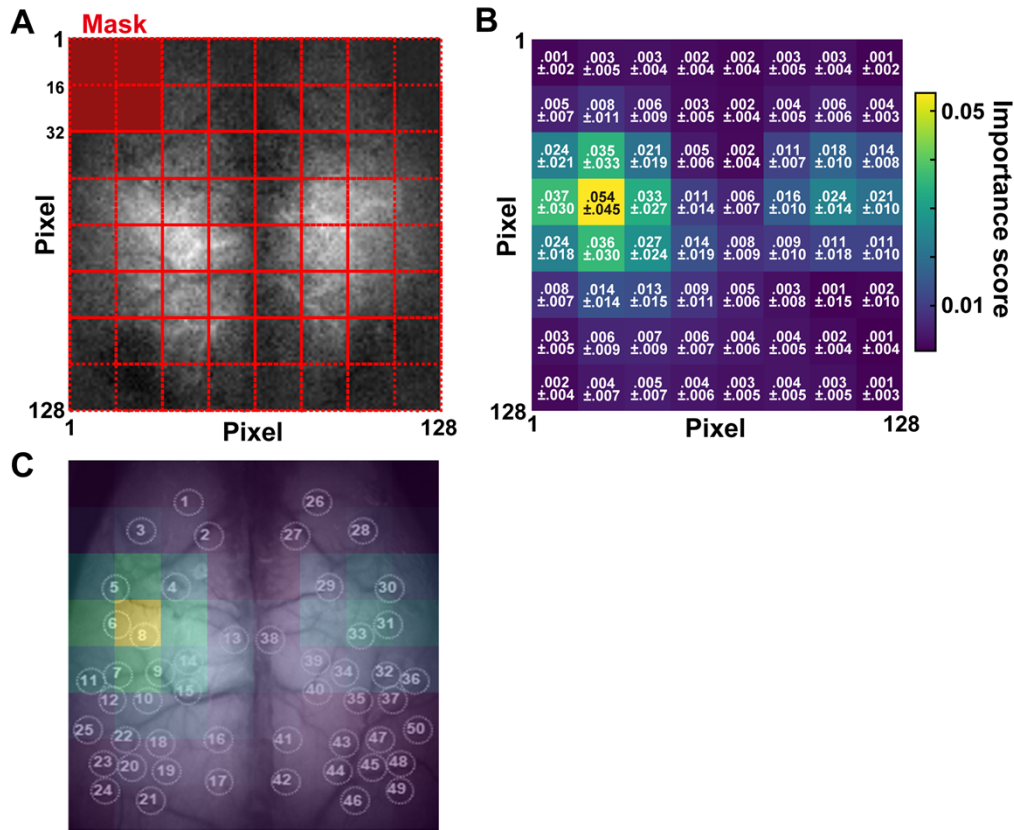

589 **Fig 3. Visualization of essential features in CNN-RNN decoder.**

590 (A) An importance score was calculated by averaging differences from classification

591 accuracy using a 1/16 masking area in each image (see Methods for details).

592 (B) Importance scores in each subdivision (mean  $\pm$  SD,  $n = 20$  models).

593 (C) Overlay of importance scores on the cortical image with ROI positions. See S2 Fig

594 for ROIs 1–50.

595

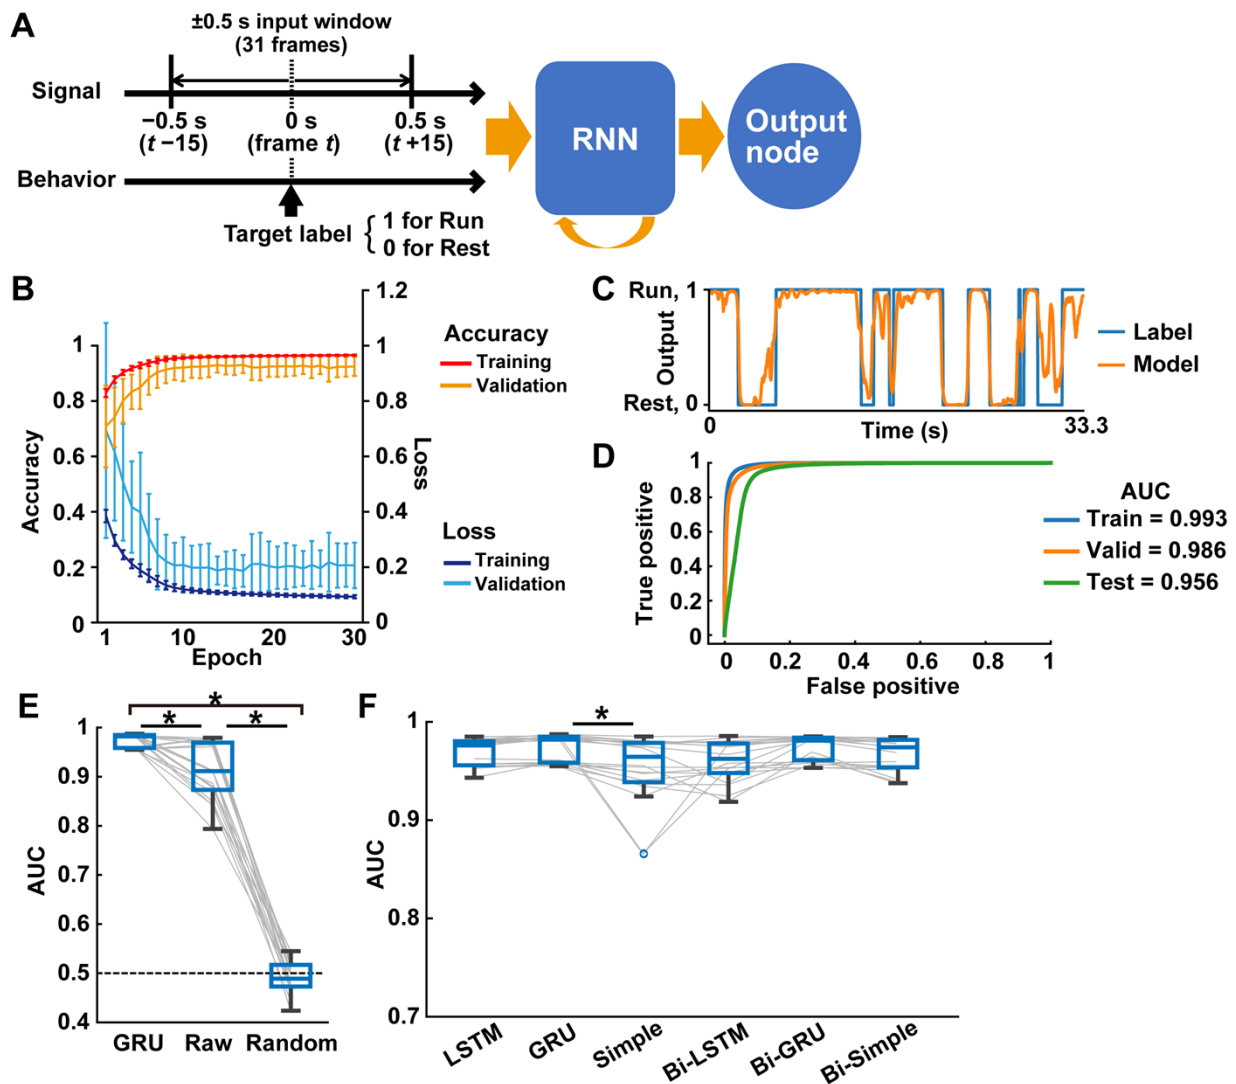

596 **Fig 4. Behavioral state classification from cortical activity using deep learning with**

597 **RNN.**

598 (A) Schematic overview of the RNN decoder for the behavioral state classification. Input

599 is the cortical activities ranging from 0.5 s before ( $t-15$  frames) to 0.5 s after ( $t+15$  frames)

600 the target frame  $t$ , which is labeled with a behavior state (1: run, 0: rest). The RNN decoder

601 outputs the probability of behavioral states for all frames of testing data.

602 (B–D) Example of the GRU decoder performance. (B) Learning curve during training  
603 and validation across 30 epochs. Loss indicates the cross entropy loss between the outputs  
604 and behavioral labels. Accuracy was the percentage of agreement with the label when the  
605 output was binarized at a 0.5 threshold. Mean  $\pm$  SD,  $n = 20$  models. (C) A trace of the  
606 output values of a representative decoder and actual behavioral labels in the first 33.3 s  
607 of testing data. (D) The receiver operating characteristic curves in the training, validation,  
608 and testing data.

609 (E) The performance of GRU decoders trained with preprocessed data (GRU), non-  
610 preprocessed data (Raw), and randomly shuffled data (Random).  $*P < 0.05$ , Wilcoxon  
611 rank-sum test with Holm correction,  $n = 20$  models.

612 (F) The decoder performance using six types of RNN architectures. LSTM, GRU, simple  
613 RNN (Simple), and their bidirectional ones (Bi-).  $*P < 0.05$ , Wilcoxon rank-sum test with  
614 Holm correction,  $n = 20$  models.

615

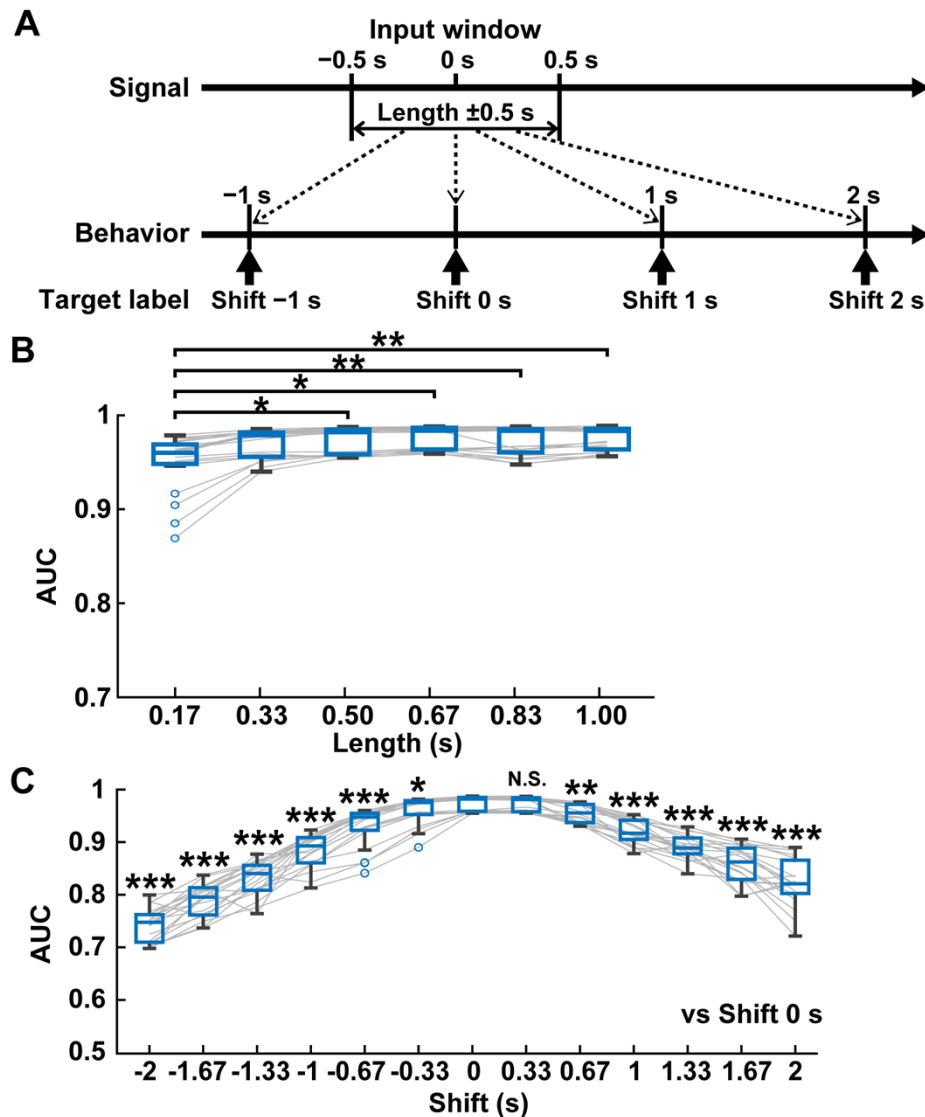

616 **Fig 5. Comparison of input window length and target label's temporal position.**

617 (A) Examples of input window and position of the target labels for behavior classification  
618 were shown. “Length” defines the duration of the input window, which ranges arbitral  
619 time (e.g., 0.5 s) before and after the center of the input window (0 s). “Shift” defines the  
620 temporal location of the target label of behavior classification from the center of the input  
621 window. The length 0.5 s and the shift 0 s were used for the criteria for evaluation.



622 (B) The decoder performance of different lengths using a fixed shift 0 s.  $*P < 0.05$ ,  $**P$   
623  $< 0.01$ , Wilcoxon rank-sum test with Holm correction,  $n = 20$  models.

624 (C) The decoder performance of different shifts using a fixed length of 0.5 s. N.S., not  
625 significant,  $*P < 0.05$ ,  $**P < 0.01$ ,  $***P < 0.001$ , Wilcoxon rank-sum test with Holm  
626 correction compared with shift 0 s,  $n = 20$  models.

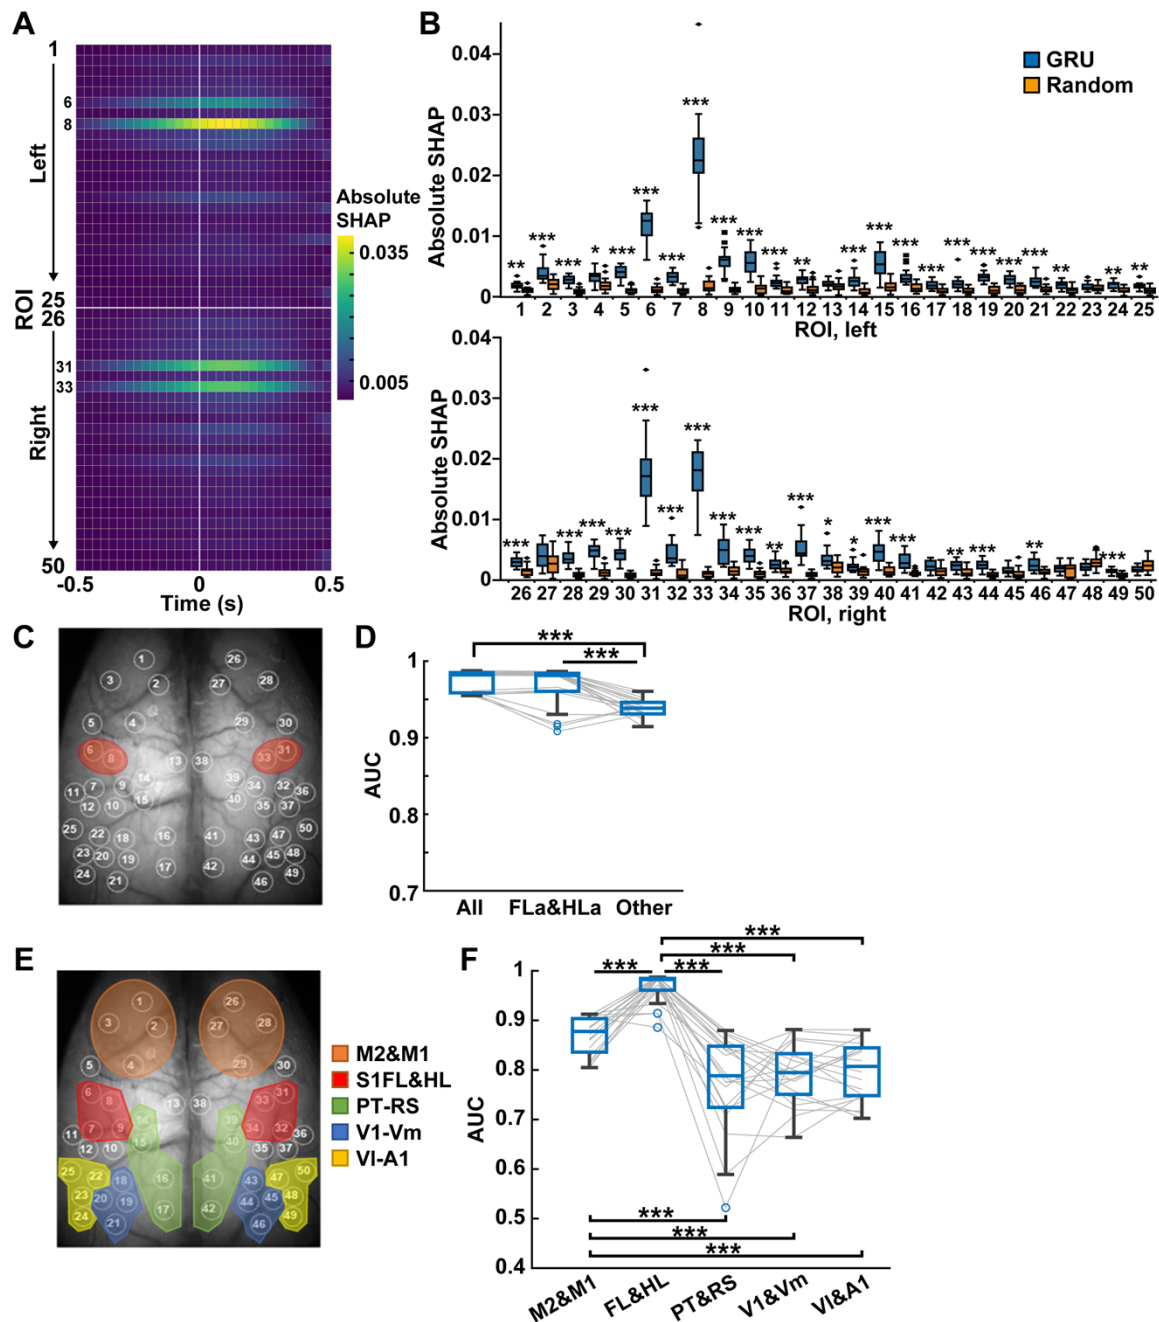

627 **Fig 6. The forelimb and hindlimb areas of the somatosensory cortex contribute to**

628 **behavioral state classification.**

629 (A) The absolute SHAP values at each ROI during the input window across all GRU

630 decoders (50 ROIs × 31 frames (-0.5 ~ 0.5 s) on 20 models average).

631 (B) The absolute SHAP values for all frames at each ROI in GRU decoders with  
632 preprocessing data (GRU) and randomly shuffled data (Random).  $*P < 0.05$ ,  $**P < 0.01$ ,  
633  $***P < 0.001$ , Wilcoxon rank-sum test with Holm correction,  $n = 20$  models. See S2 Fig  
634 for ROIs 1–50.

635 (C) Red ovals indicate the position of the somatosensory cortex anterior forelimb and  
636 hindlimb areas (ROIs 6, 8, 31, and 33).

637 (D) Decoder performance using fluorescent signals from all cortical areas (All),  
638 somatosensory cortex anterior forelimb and hindlimb areas (FLa&HLA, ROIs 6, 8, 31,  
639 and 33), and the other 46 ROIs (Other).  $***P < 0.001$ , Wilcoxon rank-sum test with Holm  
640 correction,  $n = 20$  models.

641 (E) The ROIs were divided into five parts: motor areas (M2&M1, ROIs 1–4 and 26–29),  
642 somatosensory limb areas (FL&HL, ROIs 6–9 and 31–34), parietal and retrosplenial areas  
643 (PT&RS, ROIs 14–17 and 39–42), primary visual and visual medial areas (V1&Vm,  
644 ROIs 18–21 and 43–46), and visual lateral and auditory area (Vl&A1, ROIs 22–25 and  
645 47–50).

646 (F) Decoder performance using fluorescent signals from M2&M1, FL&HL, PT&RS,  
647 V1&Vm, and Vl&A1.  $***P < 0.001$ , Wilcoxon rank-sum test with Holm correction,  $n =$   
648 20 models.
